# Supplementary material for: Cranial Functional Movement Disorders: A Case Series with Literature Review
Source: PubMed Central journal article supplement (PMC7485402; doi:10.5334/tohm.352), 2020-08-25
Supplement: tohm-10-1-352-s1.pdf [file tohm-10-1-352-s1.pdf]

**Supplementary Online Table: Review of literature of cranial functional movement disorders: Details of published cases.**

| Reference number | Author/year                 | Total number of cases                  | Number of CFMD cases | Details of CFMD                                    | Precipitating factor | Outcome                                 |
|------------------|-----------------------------|----------------------------------------|----------------------|----------------------------------------------------|----------------------|-----------------------------------------|
| 1.               | Williams 1995 <sup>37</sup> | 131 PMD cases                          | 4 FFMD               | Blepharospasm or other facial movements            | NA                   | NA                                      |
| 2.               | Factor 1995 <sup>11</sup>   | 1 FSVD case out of 28 FMD cases        | 1 female             | Case 28:<br>Slow halting voice (38/F)              | NA                   | NA                                      |
|                  |                             | 8 FFMD cases out of 28 FMD cases       | 5 females, 3 males   | Functional facial movement disorders               |                      |                                         |
|                  |                             |                                        |                      | Case 9: Blepharospasm (50/F)                       | NA                   | Unresolved                              |
|                  |                             |                                        |                      | Case 12: Head tremor (58/F)                        | Unemployment         | NA                                      |
|                  |                             |                                        |                      | Case 14: Head tremor (39/F)                        | Personal injury      | Resolved with psychological counselling |
|                  |                             |                                        |                      | Case 16: Head tremor with eyelid fluttering (59/M) | NA                   | Unresolved                              |
|                  |                             | Case 17: Jerking head movements (48/M) | NA                   | Resolved                                           |                      |                                         |

|    |                         |                                     |                                            |                                                                       |                                                      |                                          |
|----|-------------------------|-------------------------------------|--------------------------------------------|-----------------------------------------------------------------------|------------------------------------------------------|------------------------------------------|
|    |                         |                                     |                                            | Case 25:<br>Blepharospasm with dysphonia<br>(42/F)                    | Disability                                           | Resolved with improvement in psychosis   |
|    |                         |                                     |                                            | Case 27:<br>Head tremor with intermittent tongue protrusion<br>(47/M) | Delusion of possession                               | NA                                       |
|    |                         |                                     |                                            | Case 28:<br>Tongue movements<br>(38/F)                                | Litigation; after taking erroneous prescription drug | NA                                       |
| 3. | Lang 1995 <sup>38</sup> | 14 cases of functional Parkinsonism | 1 FSVD                                     | Soft voice, speech bizarre                                            | NA                                                   | NA                                       |
| 4. | Tan 2001 <sup>17</sup>  | 210 hemifacial spasm cases          | 5 females with functional hemifacial spasm | Hemi-facial spasm                                                     |                                                      |                                          |
|    |                         |                                     |                                            | Case 1 (33/F)                                                         | Stress, fatigue, anxiety                             | Remission at 2 months                    |
|    |                         |                                     |                                            | Case 2 (45/F)                                                         | Stress and anxiety                                   | Remission at 3 months, lost to follow up |
|    |                         |                                     |                                            | Case 3 (27/F)                                                         | Stress and anxiety                                   | Remission and relapse                    |
|    |                         |                                     |                                            | Case 4 (42/F)                                                         | Fatigue                                              | Remission                                |

|     |                                 |                  |                                      | Case 5<br>(26/F)                                                                                                                                                                          | Stress, fatigue,<br>anxiety | Remission and relapse |
|-----|---------------------------------|------------------|--------------------------------------|-------------------------------------------------------------------------------------------------------------------------------------------------------------------------------------------|-----------------------------|-----------------------|
| 5.  | Hinson<br>2006 <sup>39</sup>    | 88 FMD           | 25 FSVD                              | Speech severity was rated as minimal to mild                                                                                                                                              | NA                          | NA                    |
| 6.  | Ferrara<br>2008 <sup>40</sup>   | 54 FMD           | 4 FSVD                               | Disrupted speech                                                                                                                                                                          | NA                          | NA                    |
| 7.  | Ertan<br>2009 <sup>41</sup>     | 49 FMD           | 4 FSVD                               | Bizarre speech                                                                                                                                                                            | NA                          | NA                    |
| 8.  | Stone<br>2010 <sup>14</sup>     | 1                | 40/F                                 | Recurrent episodes of right “pseudoptosis” with contraction of orbicularis oculis and oris which gave an impression of right facial weakness with unilateral photophobia in the right eye | NA                          | NA                    |
| 9.  | Kranick<br>2011 <sup>42</sup>   | 64 FMD           | 8 FSVD                               | No description of speech disorder                                                                                                                                                         | NA                          | NA                    |
| 10. | Yaltho<br>2011 <sup>43</sup>    | 215 cases of HFS | 16 psychogenic out of which 15 women | Psychogenic facial movements: spasm, dystonia, tics or myoclonus                                                                                                                          | NA                          | NA                    |
| 11. | Czarnecki<br>2012 <sup>44</sup> | 60 FMD           | 7 FSVD                               | No description of speech disorder                                                                                                                                                         | NA                          | NA                    |
| 12. | Saifee<br>2012 <sup>26</sup>    | 26 FMD           | 14 FSVD                              | Difficulty speaking/slurred speech                                                                                                                                                        | NA                          | NA                    |

|     |                             |                                                     |                    |                    |                                                                            |                                                                                                                                                                           |
|-----|-----------------------------|-----------------------------------------------------|--------------------|--------------------|----------------------------------------------------------------------------|---------------------------------------------------------------------------------------------------------------------------------------------------------------------------|
| 13. | Stamelou 2012 <sup>21</sup> | 7 psychogenic out of 17 cases of palatal tremors    | Case 1:<br>30/F    | Palatal tremor(PT) | Viral labyrinthitis(3 weeks)                                               | Symptoms better after psychotherapy BoNT: improvement after 3 days; further BoNT treatments no clear benefit;2 weeks treatment with10 mg amitriptyline, clear improvement |
|     |                             |                                                     | Case 2:<br>34/F    | PT                 | Tinnitus (same time)                                                       | Pregabalin, levetiracetam, clonazepam: no benefit; diazepam: better; BoNT refused                                                                                         |
|     |                             |                                                     | Case 3:<br>33/F    | PT                 | Flu-like illness (2 days)                                                  | BoNT not tried                                                                                                                                                            |
|     |                             |                                                     | Case 4:<br>40/F    | PT                 | Sore throat, right sided otitis(same time)                                 | Clonazepam, no benefit, BoNT refused; cognitive behavioral therapy declined                                                                                               |
|     |                             |                                                     | Case 5:<br>47/F    | PT                 | Flu(1 week)                                                                | BoNT improvement                                                                                                                                                          |
|     |                             |                                                     | Case 6:<br>28/F    | PT                 | Endoscopy for nausea(2 weeks)                                              | BoNT refused                                                                                                                                                              |
|     |                             |                                                     | Case 7:<br>28/M    | PT                 | Vomiting, vertex headache (same time)                                      | Benzhexol,baclofen,diltiazem,levodopa,clonazepam:nobenefit;fluoxetine,paroxetine,BoNT:improvement                                                                         |
| 14. | Fasano 2012 <sup>7</sup>    | 61 patients of functional facial movement disorders | 56 (91.8%) females |                    | Psychological stress-22<br>Physical trauma-9<br>Peripheral facial injury-8 | All but 6 subjects received a variety of medical and non-pharmacological treatments without any benefit (56%) or worsening (20%). Aside from complete remissions          |

|     |                                      |                           |                    |                                                                            |                             |                                                                                                                                                                                                                                                         |
|-----|--------------------------------------|---------------------------|--------------------|----------------------------------------------------------------------------|-----------------------------|---------------------------------------------------------------------------------------------------------------------------------------------------------------------------------------------------------------------------------------------------------|
|     |                                      |                           |                    |                                                                            | Pain-3<br>Another disease-5 | (following a treatment or not), 20% of treated patients improved after treatment [BoNT] at therapeutic doses was effective in 5 cases, antidepressants in 3, antiepileptics in 2, and psychotherapy in 1.                                               |
| 15. | Batla 2013 <sup>45</sup>             | 18 FMD                    | 4                  | Blepharospasm:3; Facial spasm: 1                                           | NA                          | NA                                                                                                                                                                                                                                                      |
| 16. | Erro 2014 <sup>46</sup>              | 1                         | Female             | Fixed tongue dystonia with acute right Bell's palsy                        | NA                          | NA                                                                                                                                                                                                                                                      |
| 17. | Baizabal-Carvalho 2015 <sup>27</sup> | 182 FMD                   | 30 FSVD            | Stuttering, speech arrests, hypophonia, dysphonia, Foreign Accent Syndrome | NA                          | NA                                                                                                                                                                                                                                                      |
| 18. | Colosimo 2015 <sup>47</sup>          | 1                         | 29/M               | Right eye and left lower face tonic spasms                                 | NA                          | Low dose botulinum toxin treatment as well as a placebo injection of saline, administered subcutaneously in the left hemiface, led to a partial improvement in the symptoms. The clinical picture subsequently resolved spontaneously some months later |
| 19. | Gözke 2016 <sup>48</sup>             | 1                         | 44-year old female | Psychogenic facial dystonia                                                | NA                          | Resolution of symptoms within 1 week with alprazolam                                                                                                                                                                                                    |
| 20. | Kamble 2016 <sup>13</sup>            | 15 out of 73 FMD patients | 2 females, 1 male  | Abnormal head movements(3)                                                 | NA                          | NA                                                                                                                                                                                                                                                      |
|     |                                      |                           | 2 females, 1 male  | Facial dystonia(3)                                                         | NA                          | NA                                                                                                                                                                                                                                                      |
|     |                                      |                           | 1 female           | Abnormal facial movements(1)                                               | NA                          | NA                                                                                                                                                                                                                                                      |

|     |                                      |                            |                                                         |                                                                                                                                                                                                 |                                                                                                                                                 |                                                                                                                                                                                                                 |
|-----|--------------------------------------|----------------------------|---------------------------------------------------------|-------------------------------------------------------------------------------------------------------------------------------------------------------------------------------------------------|-------------------------------------------------------------------------------------------------------------------------------------------------|-----------------------------------------------------------------------------------------------------------------------------------------------------------------------------------------------------------------|
|     |                                      |                            | 2 males                                                 | Abnormal head movements + tremors(2)                                                                                                                                                            | NA                                                                                                                                              | NA                                                                                                                                                                                                              |
|     |                                      |                            | 2 males                                                 | Mutism + gait abnormality (2)                                                                                                                                                                   | NA                                                                                                                                              | NA                                                                                                                                                                                                              |
|     |                                      |                            | 2 males                                                 | Facial dystonia + mutism (2)                                                                                                                                                                    | NA                                                                                                                                              | NA                                                                                                                                                                                                              |
|     |                                      |                            | 1 female                                                | Palatal myoclonus + astasia-abasia + facial dystonia(1)                                                                                                                                         | NA                                                                                                                                              | NA                                                                                                                                                                                                              |
|     |                                      |                            | 1 male                                                  | Facial dystonia + tremors(1)                                                                                                                                                                    | NA                                                                                                                                              | NA                                                                                                                                                                                                              |
| 21. | Baizabal-Carvalho 2017 <sup>28</sup> | 15 out of 184 FMD patients | 14 females, 4 males; mean age of onset- 33 ± 13.5 years | Hemifacial spasm                                                                                                                                                                                | Trauma was reported by four patients; severe stressors by five; medications by one; history of sexual abuse by one and migraines by one patient | A single patient with psychogenic HFS was treated with BoNT with mild benefit.<br><br>All patients with psychogenic HFS were referred for stress management or psychological counselling with moderate benefit. |
| 22. | Chung 2018 <sup>12</sup>             | 6                          |                                                         | Functional speech and voice disorders with/without functional facial movement disorders                                                                                                         |                                                                                                                                                 |                                                                                                                                                                                                                 |
|     |                                      |                            |                                                         | Case 1:<br>29/F<br>Childlike prosody and intervals of slow, deliberate speech with long pauses prior to speech initiation with intermittent facial grimacing and functional lower face dystonia | NA                                                                                                                                              | NA                                                                                                                                                                                                              |

|     |                         |               |                      |                                                                                                                                                                                                                                                                                             |                                                                |    |
|-----|-------------------------|---------------|----------------------|---------------------------------------------------------------------------------------------------------------------------------------------------------------------------------------------------------------------------------------------------------------------------------------------|----------------------------------------------------------------|----|
|     |                         |               |                      | <p>Case 2:<br/>59/F<br/>Intermittent childlike speech prosody resulting from forward pursing of the lips and forward positioning of the tongue with an unusually high-pitched voice along with a downward retraction of her lower face during speech, simulating a central facial droop</p> | NA                                                             | NA |
|     |                         |               |                      | <p>Case 3:<br/>46/M<br/>Dysfluent speech with frequent pauses and intermittent stuttering along with distractible facial grimacing and excessive platysmal contraction</p>                                                                                                                  | NA                                                             | NA |
|     |                         |               |                      | <p>Case 4:<br/>38/F<br/>Acute onset dysphonic speech accompanied by distractible struggle behavior, with facial grimacing and repeated pauses scattered throughout her spontaneous speech</p>                                                                                               | NA                                                             | NA |
|     |                         |               |                      | <p>Case 5:<br/>67/F<br/>Sudden onset of stuttering speech and aphonia</p>                                                                                                                                                                                                                   | NA                                                             | NA |
|     |                         |               |                      | <p>Case 6:<br/>57/F<br/>Slow, deliberate speech with articulation and grammatical errors, and spoke with childlike prosody</p>                                                                                                                                                              | NA                                                             | NA |
| 24. | Stone 2018 <sup>8</sup> | 41 FFMD cases | Mean age: 44 years , | <p>Eye 90%<br/>Mouth 90%<br/>Unilateral Platysma Contraction 85%</p>                                                                                                                                                                                                                        | Migraine triggered functional facial movement disorders in 17% | NA |

|     |                               |     |                                                                    |                                                                                                                                                                                                                                                                      |                                                                                                                                                                                                                       |                                                                                                                                                                                                                                    |
|-----|-------------------------------|-----|--------------------------------------------------------------------|----------------------------------------------------------------------------------------------------------------------------------------------------------------------------------------------------------------------------------------------------------------------|-----------------------------------------------------------------------------------------------------------------------------------------------------------------------------------------------------------------------|------------------------------------------------------------------------------------------------------------------------------------------------------------------------------------------------------------------------------------|
|     |                               |     | 81% females                                                        | Jaw Deviation 12%<br>Tongue deviation 17%<br>Convergence Spasm 22%<br>Dysphonia 12%                                                                                                                                                                                  |                                                                                                                                                                                                                       |                                                                                                                                                                                                                                    |
| 23. | Teodo2019 <sup>15</sup>       | 101 | -                                                                  | <i>Before formal examination:</i> <ol style="list-style-type: none"> <li>1. blurred vision-12.9%</li> <li>2. double vision-5%</li> <li>3. oscillatory eye movement-3% (including one case of voluntary nystagmus)</li> <li>4. increased eye blinking-7.9%</li> </ol> | NA                                                                                                                                                                                                                    | NA                                                                                                                                                                                                                                 |
|     |                               |     |                                                                    | <i>After formal examination: 45.5%</i> <ol style="list-style-type: none"> <li>1. Saccades were abnormal in 42.6% and smooth pursuit movement in 36.6%</li> </ol>                                                                                                     | Formal eye examination                                                                                                                                                                                                | NA                                                                                                                                                                                                                                 |
|     |                               |     |                                                                    | Effortful facial expression and other responses (e.g. frowning, grimacing, effortful breathing) (26.7%) and/or excessive blinking (38.6%) predominated, with at least one of them being present in 40.6% patients                                                    | NA                                                                                                                                                                                                                    | NA                                                                                                                                                                                                                                 |
| 25. | Yoshida et 2020 <sup>20</sup> | 58  | Mean age: 46.2 years<br><br>Sex (women 42 (72.4%), men 16 (27.6%)) | Jaw deviation 43 (74.1%)<br>Jaw closing 29 (50.0%)<br><br>Lip (pulling or deviation) 20 (34.5%)<br>Tongue (protrusion or deviation) 18 (31.0%)<br><br>Cervical (platysma or sternocleidmastoid) 17 (29.3%)<br><br>Jaw opening 13 (22.4%)                             | Dental treatments 26 (44.8%)<br><br>Tooth extraction 14 (24.1%)<br><br>Bridge 4 (6.9%)<br><br>Crown 3 (5.2%)<br><br>Dental operation 3 (5.2%)<br><br>Implant treatment 1 (1.7%)<br><br>Orthodontic treatment 1 (1.7%) | Reported improvements:<br>Pharmacotherapy 34 (58.6%)<br>Muscle afferent block therapy 19 (32.8%)<br>Botulinum toxin therapy 28 (48.3%)<br>Sensory trick splint therapy 16 (27.6%)<br><br>Surgical therapy (coronoidotomy) 1 (1.7%) |



|  |  |  |  |                                                                                                                                                       |                                                                                                                                                         |  |
|--|--|--|--|-------------------------------------------------------------------------------------------------------------------------------------------------------|---------------------------------------------------------------------------------------------------------------------------------------------------------|--|
|  |  |  |  | Around mouth 12(20.7%)<br>Around eye 10 (17.2%)<br>Facial 8 (13.8%)<br>Tremor (lip or palate) 5 (8.6%)<br>Jaw protrusion 2 (3.4%)<br>Others 7 (12.1%) | Physical trauma 7 (12.1%)<br>Trauma 4 (6.9%)<br>Operation 2 (3.4%)<br>Dislocation 1 (1.7%)<br>Psychological stress 3 (5.2%)<br>Another disease 1 (1.7%) |  |
|--|--|--|--|-------------------------------------------------------------------------------------------------------------------------------------------------------|---------------------------------------------------------------------------------------------------------------------------------------------------------|--|

**Footnote:** FFMD- Functional facial movement disorder, FMD-Functional movement disorder, FSVD-Functional speech and voice disorder, HFS-Hemifacial spasm, BoNT-Botulinum neurotoxin, PT-Palatal tremor, NA- Data is not available
